## **Natural Genetic Variation Can Independently Tune the Induced Fraction and Induction Level of a Bimodal Signaling Response**

Jue Wang<sup>1,2,3</sup>, Julius Palme<sup>4</sup>, Kayla B. Lee<sup>2,5</sup>, Michael Springer<sup>2,\*</sup>

<sup>1</sup>Systems Biology Graduate Program, Harvard University, Cambridge, Massachusetts 02138

<sup>2</sup>Department of Systems Biology, Harvard Medical School, Boston, Massachusetts.

<sup>3</sup>Ginkgo Bioworks, 25-27 Drydock Avenue 8th Floor, Boston, MA 02210

<sup>4</sup>Plant Systems Biology, School of Life Sciences Weihenstephan, Technische Universität, München, 85354 Freising, Germany

<sup>5</sup>Department of Molecular and Cellular Biology, Harvard University, Cambridge, Massachusetts.

\*To whom correspondence should be addressed: [michael\\_springer@hms.harvard.edu](mailto:michael_springer@hms.harvard.edu)

## 1 **Abstract**

2 Bimodal gene expression by genetically identical cells is a pervasive feature of signaling  
3 networks, but the mechanisms modulating bimodality are poorly understood. We found that  
4 natural yeast strains induce the galactose-utilization (GAL) pathway with a variety of bimodal  
5 phenotypes in mixtures of glucose and galactose. The phenotypic variation can be described in  
6 terms of two uncorrelated features representing the fraction of cells that are induced and the  
7 expression level of the induced subpopulation. We mapped genomic loci underlying these two  
8 traits using bulk-segregant analysis, identified causal genes in 3 loci, and phenotyped allele-  
9 replacement strains containing all allelic combinations of these genes. One gene affected only the  
10 induced fraction of the GAL response, another affected only the level of induction, and a third  
11 gene affected both traits. Additionally, the genetic effect on induced fraction could be  
12 phenocopied by varying the growth conditions prior to galactose induction. Our results show that  
13 different quantitative features of a bimodal signaling response can be tuned independently by  
14 genetic and environmental perturbations, and that this tuning can change the response from  
15 unimodal to bimodal. This modularity may help cells adapt to complex natural environments on  
16 physiological as well as evolutionary timescales.

## 17 **Introduction**

18 Non-genetic heterogeneity is a pervasive feature of gene expression and cellular signaling [1–3].  
19 Bimodal responses, where cells in an isogenic population adopt one of two distinct states, are  
20 particularly important for microbes coping with fluctuating environments [4,5] and cells of  
21 multicellular organisms differentiating into discrete types [6,7]. The galactose-utilization (GAL)  
22 pathway in *Saccharomyces cerevisiae* (budding yeast) is a well-characterized bimodal response  
23 and a classic model of microbial decision-making [8,9]. GAL enzymes are tightly repressed in  
24 glucose and activated almost 1000-fold in galactose [10]. In mixtures of glucose and galactose,  
25 GAL genes induce as a function of the galactose-to-glucose ratio [11] and display complex  
26 patterns of bimodal expression [12].

27 Bimodality of GAL gene expression is attributed to bistability arising from positive feedback  
28 through the Gal1p kinase and Gal3p transducer [13,14]. However, perturbing other pathway  
29 components such as Gal2p permease, Gal4p activator, and Gal80p repressor also affect  
30 quantitative features of the GAL response [14–17]. Additionally, the modality of the GAL  
31 response is affected by the metabolic conditions prior to encountering galactose [12]. Despite the  
32 complex response of GAL expression distributions to genetic and environmental perturbations,  
33 most studies of the pathway have focused on one quantitative feature such as the induced  
34 fraction [16,18,19], with a few recent exceptions [13,20]. How multiple quantitative features of  
35 the pathway are controlled and vary across perturbations is poorly understood.

36 In previous work, we found that natural yeast isolates differed widely in the inducibility of GAL  
37 genes in glucose + galactose mixtures [19,21]. In particular, some strains displayed bimodal  
38 activation of GAL genes while other strains were unimodal in the same conditions. Similar

39 population heterogeneity has been seen in yeast maltose utilization [22] and bacterial utilization  
40 of various sugar mixtures [23]. This natural variation provides an opportunity to dissect the  
41 genetic variants modulating bimodality in nature and expand our knowledge of the repertoire of  
42 quantitative behaviors that can be achieved by this model circuit.

43 In this work, we showed that natural yeast isolates induce the GAL pathway with a diverse array  
44 of bimodal and unimodal expression patterns that vary with sugar conditions. We analyzed this  
45 variation in terms of two traits representing the induced fraction of cells and the expression level  
46 the induced subpopulation, which vary in an uncorrelated way across natural isolates. Using bulk  
47 segregant analysis and CRISPR/cas9 allele replacement, we identified genetic variants  
48 underlying these two traits and showed that the variants can affect the traits independently of  
49 each other. Additionally, we found that the metabolic history of cells before inducing GAL genes  
50 also affects the bimodal response in a trait-specific way. The independent tuning of these two  
51 quantitative features of the GAL response can account for the diversity of unimodal and bimodal  
52 phenotypes observed in our natural isolates. This genetic flexibility may be advantageous for  
53 cells adapting to complex natural nutrient environments.

## 54 **Results**

### 55 **Natural yeast isolates vary in the degree of bimodality of GAL induction**

56 To study natural variation in the population behavior of the GAL pathway response, we  
57 measured the expression of a GAL1 promoter driving YFP (GAL1pr-YFP) in 34 geographically  
58 and ecologically diverse yeast strains [21,24,25] grown in a titration of glucose plus a constant  
59 level of galactose. As expected, we found that all strains are uninduced in high glucose and fully  
60 induced in low or no glucose (Figure 1). However, at intermediate glucose concentrations, some

61 strains display a unimodal population with intermediate (i.e. sub-maximal) GAL expression  
62 (Figure 1B) while other strains display a bimodal mixture of uninduced and partially induced  
63 cells (Figure 1C). Additionally, strains with the same modality still have quantitatively different  
64 GAL induction profiles (Figure S1), raising the question of what mechanisms can give rise to  
65 these diverse signaling phenotypes.

### 66 **Variation in GAL bimodality phenotypes can be parameterized by two uncorrelated** 67 **metrics**

68 Upon close inspection, the GAL induction phenotypes generally seem to be a mixture of two  
69 components: an induced subpopulation that decreases in YFP level as glucose increases, and an  
70 uninduced subpopulation that remains at the same YFP level regardless of glucose concentration  
71 (Figure S2A). The mixing of these components can be quantified as an induced fraction that  
72 decreases as a function of glucose concentration (Figure S2B). Simply by varying the glucose-  
73 dependence of the induced fraction and of the induced subpopulation expression level, we can  
74 simulate many bimodal phenotypes, as well as unimodal phenotypes, reminiscent of the observed  
75 data (Figure S1, S4.2B-C). In this framework, a strain which is unimodal in a particular  
76 condition has an induced fraction of one (but a sub-maximal induced level), while a strain that is  
77 bimodal in this condition has an induced fraction of less than one.

78 Applying this population decomposition framework to our data, we computationally separated  
79 induced and uninduced cells from each GAL reporter distribution (Figure 2E) and calculated two  
80 summary metrics for each strain's phenotype:  $E_{10}$ , the glucose concentration where the induced  
81 subpopulation reaches 10% of its maximal GAL expression level, and  $F_{50}$ , the glucose  
82 concentration where 50% of cells in the population are induced (Figure 2F). For convenience,  
83 these metrics are in log<sub>2</sub>-transformed units, so a strain with  $E_{10} = -1$  has an induced

84 subpopulation that reaches 10% of maximal induction at  $2^{-1} = 0.5\%$  w/v glucose. We find that  
85 the  $E_{10}$  and  $F_{50}$  are uncorrelated across natural isolates, suggesting the possible existence of  
86 genetic changes that can decouple them (Figure 2G).

### 87 **Bulk segregant analysis identifies genetic loci associated with GAL induction variation**

88 To analyze the genetic basis of  $E_{10}$  and  $F_{50}$ , we crossed strains S288C and DBVPG1106 and  
89 phenotyped random haploid segregants from their hybrid. These parent strains differ in both  
90 traits, and their segregants display semi-continuous, correlated variation in these traits with a  
91 small number of outliers. Therefore,  $E_{10}$  and  $F_{50}$  are likely modulated by multiple genes, at least  
92 some of which affect both traits.

93 To identify these genes, we performed bulk-segregant linkage mapping using a pooled sorting  
94 strategy (Figure 2B). We chose a glucose+galactose condition where the parental GAL1pr-YFP  
95 distributions were maximally different and used it to induce a pooled mixture of haploid (MATa)  
96 segregants (Figure 2C). We then used FACS to sort the segregants into pools of uninduced  
97 (“OFF”), induced and low-expression (“LOW”), and induced and high-expression (“HI”) cells  
98 (Figure 2C), and sequenced each pool to 15-33x coverage. We expected that a genomic locus  
99 affecting the induced level (and thus  $E_{10}$ ) will differ in allele frequency between the LOW and  
100 HI pools, while any locus affecting the induced fraction (and thus  $F_{50}$ ) would differ in parental  
101 allele frequency between the OFF pool and a computationally merged LOW+HI pool (“ON”)  
102 (Materials and Methods).

103 We found 5 loci with significantly different allele frequencies between OFF/ON pools or  
104 between LOW/HI pools, defined as genomic regions with a peak log-odds (LOD) score  $> 5$   
105 calculated by MULTIPOOL [26] (Figure 3D; Materials and Methods). To look for causal

106 variants, we inspected gene annotations in a region of 2-LOD decrease around each LOD peak.  
107 The three most significant loci are centered at chrIV:457Kb, chrXIV:457Kb, and chrXVI:81Kb  
108 and contain the genes *GAL3*, *MKT1*, and *GAL4*, respectively (Figure 3D). *GAL3* and *GAL4* are  
109 direct regulators of galactose sensing, while *MKT1* is known to have pleiotropic effects in  
110 crosses between S288C and natural isolates. The *GAL3*-associated locus was significant only in  
111 the OFF/ON comparison, while the *GAL4*-associated locus was only significant in the LOW/HI  
112 comparison, suggesting that the effect of these loci are specific to either  $E_{10}$  or  $F_{50}$ . The *MKT1*-  
113 associated locus was significant in both comparisons but had a higher LOD score in the LOW/HI  
114 than in the OFF/ON comparison. Unlike the other loci, the *GAL4*-associated locus was enriched  
115 for the S288C allele in the DBVPG1106-like segregant pool, suggesting the possibility of  
116 transgressive segregation. Two other loci, at chrXII:1053Kb and chrXIII:105Kb, were also  
117 significant and seemed to have phenotype-specific effects, but did not contain any obvious genes  
118 for follow-up. Therefore, we focused on the chrIV (*GAL3*-associated), chrXIV (*MKT1*-  
119 associated), and chrXVI (*GAL4*-associated) loci for further investigation.

120 ***GAL3* and *GAL4* alleles specifically affect  $F_{50}$  and  $E_{10}$  while *MKT1* alleles affect both traits**

121 To test if *GAL3*, *MKT1*, and *GAL4* alleles are causal variants in the chrIV, chrXIV, and chrXVI  
122 loci, we used CRISPR/cas9 to replace the coding region and flanking regions of each gene  
123 (Materials and Methods) in both DBVPG1106 and S288C with the allele from the other parent  
124 (Figure S4). In DBVPG1106, replacing the endogenous *GAL3* allele with *GAL3*<sup>S288C</sup> shifted  $F_{50}$   
125 in the direction of the S288C parent (Figure S4A). *MKT1* replacement also shifted  $F_{50}$  and had a  
126 small effect on  $E_{10}$  as well. *GAL4* replacement had a small but clear effect on  $E_{10}$  and no  
127 detectable effect on  $F_{50}$ . In the S288C background, allele replacements had similar trait-  
128 specificity but much smaller effects (Figure S4B-C). In both parental backgrounds, the *GAL4*

129 allele replacement resulted in a change in  $E_{10}$  away from the value of the other parent. This is  
130 consistent with the sign of allele-frequency differences of the *GAL4*-containing locus between  
131 LOW and HI pools (Figure 2D) and confirms that *GAL4* is a transgressive allele in this cross.  
132 Overall, these results show that *GAL3*, *MKT1*, and *GAL4* are causal variants in their respective  
133 loci and corroborate the allelic effects inferred from our bulk segregant analysis.

134 The single allele replacements only modestly altered the phenotype of the parent strains,  
135 suggesting that other genes make substantial contributions to the total phenotypic difference.  
136 Alternatively, there may be genetic interactions between our mapped genes such that allele  
137 replacement of 2 or 3 of them is sufficient to achieve conversion of one parental phenotype to the  
138 other. To assess these possibilities, we constructed all 16 combinations of strain background,  
139 *GAL3* allele, *MKT1* allele, and *GAL4* allele from either the DBVPG1106 or S288C parent, and  
140 measured  $E_{10}$  and  $F_{50}$  of 2 independent isolates of each of the 16 genotypes. We examined the  
141 resulting phenotypic landscape (Figure 3A) in terms of pairs of strains differing in the allelic  
142 status of one gene (or strain background) while other genetic factors are held constant. The effect  
143 of switching from the the DBVPG1106 genetic variant to the S288C variant can be visualized as  
144 a vector in  $E_{10}$  versus  $F_{50}$  space (Figure 3B-E) or as a trait difference (Figure 3F).

145 This analysis reveals that the trait-specificity of single genetic changes are broadly consistent  
146 across different genotypic backgrounds (i.e. combinations of strain background and alleles at the  
147 other loci). This can be seen in the fact that effect vectors from DBVPG1106 to S288C variants  
148 in  $E_{10}$ - $F_{50}$  space are parallel (Figure 3B-E), or equivalently, that differential effects cluster by  
149 angle to the origin (Figure 3F). Across the combinatorial allele replacement strains, it is clear  
150 that *GAL3* allele predominantly affects  $F_{50}$ , *GAL4* mostly affects  $E_{10}$ , and *MKT1* affects both  
151 traits. For example, a strain with *GAL4*<sup>S288C</sup> has a lower  $E_{10}$  than the congenic strain with



152  $GAL4^{DBVPG1106}$  for all such strain pairs. These results show that  $E_{10}$  and  $F_{50}$  can be tuned  
153 independently in this cross.

154 In contrast to trait-specificity, the effect sizes of single genetic changes across the combinatorial  
155 landscape are more complicated. In general,  $GAL3$  allele effects on  $F_{50}$  are large, spanning up to  
156 half the phenotypic distance between the parents.  $MKTI$  allele effects on  $F_{50}$  are almost as great,  
157 and combined with  $GAL3$  allele replacement, can essentially phenoconvert DBVPG1106 to  
158 S288C, but only along the  $F_{50}$  axis (DSSD versus in DDDD in Figure 3A). However, the  
159 reciprocal replacement in the S288C background has a more modest effect (SDDS versus SSSS  
160 in Figure 3A). Consistent with these findings, the strain background effect on  $F_{50}$  (which can be  
161 interpreted as the residual variation after allele replacements) varies widely, from negligible to  
162 almost as large as that of  $GAL3$  or  $MKTI$ . For the  $E_{10}$  trait,  $GAL4$  allele effects span between a  
163 third and half the phenotypic distance between the parents, but in the opposite direction required  
164 for phenoconversion. Therefore, triple allele replacement strains DSSS (DBVPG1106  $GAL3^{S288C}$   
165  $MKTI^{S288C}$   $GAL4^{S288C}$ ) and SSSD still differ substantially in  $E_{10}$  from their respective wildtype  
166 SSSS and DDDD strains. Overall, strain background has effects on both  $E_{10}$  and  $F_{50}$  in most  
167 genotype backgrounds, indicating substantial variation in both traits not accessed by our allele  
168 swaps.

### 169 **Genetic and environmental perturbations that affect $F_{50}$ do not affect $E_{10}$**

170 Our results above show that  $F_{50}$  can be tuned independently of  $E_{10}$  by some genetic variants in  
171 the S288C x DBVPG1106 cross. To see if this is true over a larger range of  $F_{50}$ , we analyzed  
172 phenotypic data on S288C, BC187, and DBVPG1106 strains whose  $GAL3$  loci have been  
173 replaced with a panel of natural  $GAL3$  alleles that we previously showed to underlie a spectrum

174 of GAL inducibility phenotypes [19]. As expected,  $F_{50}$  varied widely as the *GAL3* allele is  
175 changed (Figure 4A). However, variation in  $E_{10}$  with *GAL3* allele was minimal and driven  
176 almost entirely by the strain background (Figure 4B).

177 Previously, a laboratory yeast strain was found to induce GAL genes bimodally or unimodally  
178 depending on the carbon source prior to galactose induction [12]. To see how metabolic memory  
179 affects  $E_{10}$  and  $F_{50}$  across our natural isolates, we pre-grew six strains in raffinose, acetate, or  
180 glycerol prior to induction in glucose + galactose. These carbon sources are neither inducers of  
181 GAL genes nor signals for glucose catabolite repression [27]. Nevertheless, they caused the yeast  
182 strains to exhibit different  $F_{50}$  upon subsequent induction in glucose + galactose (Figure 4C). We  
183 did not observe a carbon source pre-conditioning effect on  $E_{10}$  (Figure 4D). This parallels the  
184 effect of *GAL3* alleles, and suggests that the independent tuning of  $E_{10}$  and  $F_{50}$  is a consequence  
185 of how the GAL circuit is integrated with carbon metabolism more broadly.

### 186 **Independent tuning of $F_{50}$ and $E_{10}$ modulates the modality of the GAL response**

187 The definitions of the  $E_{10}$  and  $F_{50}$  metrics (Figure 1F, S4.2) imply that tuning either parameter  
188 independently should alter the apparent number of modes in GAL expression distributions. Since  
189  $F_{50}$  varies over a wider range of glucose concentrations than  $E_{10}$  does under the perturbations we  
190 tested, we asked if independently tuning  $F_{50}$  affects modality. Indeed, plotting GAL reporter  
191 distributions shows that a number of allele replacements are able to convert strains from being  
192 bimodal to unimodal and vice versa. For example, DBVPG1106 is bimodal, but replacing alleles  
193 with *GAL3*<sup>S288C</sup> and *MKT1*<sup>S288C</sup> increases its  $F_{50}$  and makes it unimodal (Figure 5A-B).  
194 Conversely, BC187 is unimodal, but decreasing its  $F_{50}$  by introducing *GAL3*<sup>YJM978</sup> makes it  
195 bimodal (Figure 5C-D). Finally, Y12-WashU, one of the most obviously bimodal strains, is

196 rendered unimodal when pre-conditioned in acetate rather than raffinose before galactose  
197 induction (Figure 5E-F).

## 198 **Discussion**

### 199 **Independent tuning and the molecular mechanism of bimodality**

200 It is known that positive feedback on GAL gene expression through *GAL3* tunes the switching  
201 rate of cells between uninduced and induced states [14] and is a key contributor to the bistability  
202 of the pathway [13]. Changes in *GAL3* dosage affects the induced fraction of GAL genes [16],  
203 and a panel of natural *GAL3* variants confers a spectrum of GAL induction phenotypes [19]. We  
204 put these previous observations in context by showing that natural *GAL3* alleles specifically  
205 affect the sugar threshold where individual cells to switch to an induced state, while the level of  
206 induction in that state is set by *GAL4* and other unknown genes. Both these features combine to  
207 yield the population level behavior of the circuit, including apparent patterns of bimodality.  
208 Underscoring this point, we found that *GAL3* allele replacement is sufficient to convert a  
209 unimodal response to bimodal, and vice versa, while the level of the induced subpopulation  
210 remains unchanged. This degree of modularity in the quantitative behavior of the GAL circuit  
211 was previously unappreciated.

212 *GAL4* is the transcription factor activating all inducible GAL genes [10,28]. Previously, changes  
213 in dosage of *GAL4* was found to have no effect on the GAL induced fraction [16]. The S288C  
214 variant of *GAL4* contains a non-conservative R95G mutation, as well as a conservative R508K  
215 mutation, relative to DBVPG1106 and other natural isolates. Residue 95 is on a loop linking the  
216 DNA-binding and regulatory domains of *GAL4* and directly participates in interactions with  
217 Gal11p [29,30], a component of the RNA polymerase II mediator complex that enhances

218 expression of *GAL* genes [31]. These observations suggest that the S288C and DBVPG1106  
219 *GAL4* alleles might differ in their ability to activate transcription of *GAL* genes. This effect  
220 could be specific to induced level if differences in *GAL4* activity only affect *GAL* promoters that  
221 are in an active state and the latter variable is separately dictated by feedback loops such as  
222 *GAL3*. An important question for future work is whether this scenario is quantitatively plausible  
223 in a mathematical model of the *GAL* circuit, and what general features of this and other circuits  
224 allow for independent tuning.

### 225 **Modularity of the *GAL* pathway, genetic background, and metabolic state**

226 We also find that *MKT1* alleles affect the *GAL* response and can play almost as large a role as  
227 *GAL3*. *MKT1* is involved in maintaining killer toxin [32], regulating translation [33], and affects  
228 numerous traits in crosses between S288C and natural isolates [34–39]. The S288C allele of  
229 *MKT1* is a loss-of-function variant relative to natural alleles and causes lower expression of  
230 mitochondrial genes [40,41]. In turn, deletion mutants of mitochondrial genes tend to exhibit  
231 aberrant *GAL* induction; this effect is more pronounced on the induced fraction than on induced  
232 level [42], echoing our observations. Therefore, it is likely that the effect of *MKT1* allele on *GAL*  
233 induction is due to perturbations to mitochondrial function.

234 We found that much of the variation in  $E_{10}$ , and to a lesser extent  $F_{50}$ , must be attributed to  
235 unknown alleles in the genetic background. This dovetails with other recent reports that many  
236 traits in yeast are dominated by large effects from one or a few loci but can be tuned  
237 quantitatively by many small-effect loci [19,42–44]. Moreover, *MKT1* is not a member of the  
238 canonical *GAL* pathway, and nor are any genes in 2 other loci that reached significance in our  
239 linkage mapping. Combined with observations that deletion mutants of up to quarter of all yeast

240 genes have quantitatively perturbed GAL signaling [42], our results indicate that decision-  
241 making circuits are not as modular with respect to genetic variation as is often assumed.

242 In addition to genetic effects on GAL induction, we found that culturing cells in raffinose,  
243 glycerol, or acetate prior to induction in a glucose + galactose led to very different GAL  
244 phenotypes. Raffinose is commonly used to pre-culture cells for GAL induction studies  
245 (including most experiments here) because unlike glucose, it does not visibly repress GAL genes  
246 [14,45]. We chose glycerol and acetate by the same criterion. Otherwise, however, these carbon  
247 sources elicit very different physiological responses. Raffinose is hydrolyzed to release fructose  
248 [46], which can then be fermented [47,48]. Glycerol and acetate, by contrast, must be utilized via  
249 respiration [49], which entails expression changes in many genes [50] as well as differences in  
250 ATP/ADP ratio and redox state [51]. Therefore, our results suggest that factors other than  
251 canonical glucose catabolite repression may be important in setting the inducibility of GAL  
252 genes.

253 Our results indicate that memory of metabolic state is encoded by the GAL circuit and persists  
254 even after the cells have reached steady-state in inducing conditions (Figure 5B, Materials and  
255 Methods). This appears to be a distinct phenomenon from the “memory” of glucose or galactose  
256 pre-induction conditions previously attributed to bistability of the GAL network [14,52].

257 However, the fact that pre-induction carbon source specifically affects  $F_{50}$ , just as *GAL3* allele  
258 does, suggests that this positive feedback loop may be a nexus of regulation of GAL genes by  
259 multiple signals in the cell. Indeed, recently it was shown that NAD(P) can directly bind Gal80p  
260 and thereby impact downstream GAL pathway expression [53,54]. Since these studies relied on  
261 bulk measurements, it will be interesting to revisit these investigations using quantitative, single-  
262 cell readouts of pathway behavior.

## 263 **Physiological and ecological role of independent tuning**

264 Our results raise the question of why independent tuning of induced fraction and induced level  
265 would exist in nature. Previously we showed that natural variation in the timing of GAL  
266 induction during diauxic growth leads to a fitness tradeoff—some strains prepare for glucose  
267 exhaustion at an upfront cost while others maximize their growth rate on glucose but suffer a  
268 diauxic lag [21]. Related work showed that both strategies could be implemented by the same  
269 strain as part of a bimodal response [20], and that this may be an evolutionarily stable strategy  
270 [55]. Under this framework, tuning  $E_{10}$  and  $F_{50}$  separately would allow the timing of the  
271 inducing population, and its level of induction, to evolve separately. This could provide fitness  
272 benefits in certain conditions, although exactly what these conditions are would depend on the  
273 quantitative details of the costs and benefits of induction, an interesting issue to be explored in  
274 future work.

## 275 **Materials and Methods**

### 276 **Strains and media**

277 Strains were obtained as described in [21]. An initial set of 42 strains were assayed in glucose  
278 gradients + galactose. Strains CLIB324, L-1528, M22, W303, YIIC17-E5, YJM975, YJM981  
279 were excluded from downstream analysis due to poor growth in our media conditions. Strain  
280 378604X was also excluded due to a high basal expression phenotype that was an outlier in our  
281 collection. The genetic basis of this behavior is likely an interesting topic for follow-up studies.  
282 All experiments were performed in synthetic minimal medium, which contains 1.7g/L Yeast  
283 Nitrogen Base (YNB) (BD Difco) and 5g/L ammonium sulfate (EMD), plus D-glucose (EMD),  
284 D-galactose (Sigma), or raffinose (Sigma). Cultures were grown in a humidified incubator

285 (Infors Multitron) at 30°C with rotary shaking at 230rpm (tubes and flasks) or 999rpm (600uL  
286 cultures in 1mL 96-well plates).

### 287 **Flow cytometry assay in glucose gradient**

288 GAL induction experiments were performed in a 2-fold dilution series of glucose concentration,  
289 from 2<sup>0</sup>% to 2<sup>-9</sup>% w/v, with constant 0.25% galactose. 2% glucose and 2% galactose conditions  
290 were also included with each glucose titration experiment. To assess and control for well-to-well  
291 variation, experiments were performed as a co-culture of a “query” strain to be phenotyped and a  
292 “reference” strain that was always SLYB93 (natural isolate YJM978 with constitutive mCherry  
293 segmentation marker).

294 To start an experiment, cells were struck onto YPD agar from -80C glycerol stocks, grown to  
295 colonies, and then inoculated from colony into YPD liquid and cultured for 16-24 hours. Then,  
296 query and reference strain cultures were mixed 9:1 by volume and inoculated in a dilution series  
297 (1:200 to 1:6400) in S + 2% raffinose medium. The raffinose outgrowths were incubated for 16-  
298 20 hours, and then their optical density (OD<sub>600</sub>) was measured on a plate reader (PerkinElmer  
299 Envision). One outgrowth culture with OD<sub>600</sub> closest to 0.1 was selected for each strain, and then  
300 washed once in S (with no carbon sources). Washed cells were diluted 1:200 into glucose +  
301 galactose gradients in 96-well plates (600uL cultures in each well) and incubated for 8 hours.  
302 Then, cells were harvested and fixed by washing twice in Tris-EDTA pH 8.0 (TE) and  
303 resuspended in TE + 0.1% sodium azide before transferring to a shallow microtiter plate  
304 (CELLTREAT) for measurement. Flow cytometry was performed using a Stratadigm S1000EX  
305 with A700 automated plate handling system. Data analysis was performed using custom  
306 MATLAB scripts, including Flow-Cytometry-Toolkit ([https://github.com/springerlab/Flow-](https://github.com/springerlab/Flow-Cytometry-Toolkit)  
307 [Cytometry-Toolkit](https://github.com/springerlab/Flow-Cytometry-Toolkit)).

308 Experiments using glycerol and acetate as pre-induction carbon sources were done as above,  
309 except S + 3% glycerol or S + 2% potassium acetate were used instead of raffinose medium for  
310 the outgrowth step.

### 311 **Crossing and generating segregants**

312 To prepare parent strains for crossing and sporulation, we sporulated diploid natural isolates  
313 bearing the  $ho\Delta::GAL1pr-YFP-hphNT1$  reporter cassette and isolated random spores that  
314 displayed  $MATa$  or  $MAT\alpha$  phenotypes in test crosses. We then introduced a constitutive  
315 fluorescent marker in tandem with the GAL reporter, to obtain  $MATa; ho\Delta::GAL1pr-YFP-$   
316  $mTagBFP2-kanMX4$  or  $MAT\alpha; ho\Delta::GAL1pr-YFP-mCherry-natMX4$  parent strains. To the  
317  $MATa$  parent we also introduced a pRS413-derived plasmid bearing  $STE2pr-AUR1-C$  and  
318  $hphNT1$ . This plasmid is maintained by hygromycin selection but also allows selection for  
319  $MATa$  cells by Aureobasidin A [56]. This plasmid design is inspired by a similar mating-type  
320 selection plasmid used in a recent study [57].

321 To isolate segregants for phenotyping, we crossed a parent with BFP-kanMX + MAT-selection  
322 plasmid to a parent with mCherry-natMX and isolated a  $G418^R Nat^R Hyg^R$  diploid hybrid with the  
323 plasmid. We sporulated the hybrid by culturing it to saturation in YPD, diluting 1:10 in YP+2%  
324 potassium acetate and incubating at 30C for 8 hours, and washing and resuspending into 2%  
325 potassium acetate and incubating at 30C until >20% of cells were tetrads, or about 3 days. We  
326 incubated  $\sim 5 \times 10^6$  tetrads in 100uL water with 50U of zymolyase 100T (Zymo Research) for 5  
327 hours at 30C, and then resuspended tetrads in 1mL of 1.5% NP-40 and sonicated for 10 seconds  
328 at power setting 3 on a probe sonicator (Fisher Scientific). The resulting segregants were plated  
329 on YPD + 0.5ug/mL Aureobasidin A (“AbA”; Clontech) and random colonies were picked into



330 YPD liquid and saved as glycerol stocks. Haploidy was confirmed by mating to tester strains  
331 with known mating type. 90 segregants were phenotyped for GAL induction as described above.

### 332 **Sorting-based bulk-segregant analysis**

333 To generate segregant pools, we prepared a diploid hybrid and sporulated it as described above.  
334 To reduce the size of recombination blocks and improve the resolution of linkage mapping [58],  
335 we then performed the following “intercross” protocol 4 times: from spore suspension, use Sony  
336 SH800 Cell Sorter to sort  $4 \times 10^6$  BFP+ or mCherry+ (but not ++ or --) cells into 100uL YPD +  
337 40ug/mL tetracycline; incubate for 16 hours at 30C without shaking; add 5mL YPD + 200ug/mL  
338 G418 + 100ug/mL ClonNat + 200ug/mL Hygromycin B and incubate 48 hours at 30C with  
339 shaking; sporulate cultures and prepare sonicated spore suspension. After the 4<sup>th</sup> sporulation  
340 cycle, the sonicated spores were resuspended in YPD + 0.5ug/mL AbA and incubated at 30C for  
341 16 hours. This culture was frozen as a glycerol stock, as well as used to inoculate the galactose-  
342 induction sorting experiment.

343 To sort segregant pools for bulk genotyping, we inoculated the intercrossed, MATa-selected  
344 segregants from a saturated YPD culture into S + 2% raffinose + AbA at dilutions of 1:200,  
345 1:400, 1:800, and 1:1600, and incubated at 30C for 16-24 hours. We chose the raffinose culture  
346 with OD closest to 0.1, washed once in S (0.17% Yeast Nitrogen Base + 0.5% Ammonium  
347 Sulfate), and diluted 1:200 into S + 0.25% glucose + 0.25% galactose + AbA. We incubated the  
348 glucose-galactose culture at 30C for 8 hours, and then used a Sony SH800 sorter to isolate pools  
349 of 30,000 cells with the 5% lowest (“OFF”) and highest (“HI”) YFP expression, among cells  
350 whose Back Scatter (BSC) signal was between  $10^5$  and  $3 \times 10^5$ . The “LOW” pool was similarly  
351 obtained, but from the 5% of cells with lowest non-basal expression (Figure S3). The sorted cells  
352 were resuspended in YPD + AbA and incubated at 30C until saturation, about 16-24 hours. An

353 aliquot of this culture was saved for -80C glycerol stocks, and another was used to prepare  
354 sequencing libraries.

355 To sequence the segregant pools, we extracted genomic DNA from 0.5mL of saturated YPD  
356 culture of each segregant pool using the PureLink Pro 96 kit (Thermo Fisher K182104A). From  
357 these genomic preps, we made sequencing libraries using Nextera reagents (Illumina FC-121-  
358 1030) following a low-volume protocol [59]. We adjusted the input DNA concentration so that  
359 resulting libraries had mean fragment sizes of 200-300bp as measured on a BioAnalyzer.

360 Libraries were multiplexed and sequenced in an Illumina NextSeq flow cell to a depth of 16-33x.

361 Reads from the Illumina sequencing were aligned to the *sacCer3* reference genome using *bwa*  
362 *mem*, and SNP counts were generated using *samtools mpileup*, on the Harvard Medical School  
363 Orchestra cluster . These outputs were processed in MATLAB using custom code as follows:

364 SNPs with coverage less than 2 or more than 1000 were removed. The LOW and HI pools were  
365 computationally merged into an ON pool. To make sure the two pools contributed equally to the  
366 merged pool, at each SNP, allele counts in the pool with higher coverage were randomly  
367 subsampled to the coverage of the other pool. The final allele counts in each pool were output to  
368 text files by chromosome and given as inputs to the MULTIPOOL algorithm (*mp\_inference.py*  
369 version 0.10.2) [60] to compute LOD scores. Loci with maximal  $LOD > 5$  were considered  
370 significant; previous work showed that this corresponded to an FDR of 5% [61,62]. This  
371 correspondence may differ under our experimental conditions; therefore, the 2 loci that we did  
372 not validate experimentally should be interpreted with caution.

### 373 **CRISPR/Cas9 allele replacement**

374 Allele replacement strains were constructed using 3 rounds of gene knockout followed by  
375 CRISPR/Cas9-mediated markerless integration of heterologous allele. Initially, strains were  
376 prepared by introducing Cas9 on a CEN/ARS plasmid (SLVF11); this plasmid is derived from a  
377 previous one [63], but we replaced the auxotrophic *URA3* marker with *AUR1-C* to allow  
378 Aureobasidin A selection on prototrophic natural isolates. In each round of allele replacement, a  
379 gene plus upstream and downstream flanking sequences (-784bp to +815bp for *GAL3*, -449bp to  
380 +372bp for *MKT1*, -191bp to +139bp for *GAL4*) was deleted by integration of a kanMX6 marker  
381 with 40bp flanking homology. Then, a donor DNA, a guide RNA insert, and a guide RNA  
382 backbone were simultaneously transformed into the strain [64]. The donor DNA contains the  
383 new allele, its flanking sequences, and an additional 40bp of homology to target it to the correct  
384 genomic locus. The guide RNA insert was a linear DNA containing a SNR52 promoter driving a  
385 guide RNA gene containing a 20bp CRISPR/Cas recognition sequence linked to a crRNA  
386 scaffold sequence, plus 40bp of flanking homology on both ends to a guide RNA backbone. The  
387 guide RNA backbone was a 2u plasmid containing natMX4 (pRS420). This was linearized by  
388 NotI + XhoI digestion before transformation. Allele re-integration transformations were plated  
389 on cloNAT to select for in vivo assembly of the guide RNA into a maintainable plasmid, and  
390 Aureobasidin A to select for presence of Cas9. Successful re-integration was verified by colony  
391 PCR and Sanger sequencing was performed on a subset of strains and on all donor DNAs to  
392 verify the sequence of allelic variants.

## 393 Acknowledgments

394 Rishi Jajoo, Dawn Thompson, and Andrew Murray for critical reading of the manuscript; Sarah  
395 Boswell, Bo Hua, Yarden Katz, and Chiara Ricci-Tam for helpful discussions; Shervin Javadi  
396 and Stratedigm for flow cytometry assistance.

## 397 References

- 398 1. Kaern M, Elston TC, Blake WJ, Collins JJ. Stochasticity in gene expression: from theories  
399 to phenotypes. *Nat Rev Genet.* 2005;6: 451–464. doi:10.1038/nrg1615
- 400 2. Balázsi G, van Oudenaarden A, Collins JJ. Cellular decision making and biological noise:  
401 from microbes to mammals. *Cell.* 2011;144: 910–25. doi:10.1016/j.cell.2011.01.030
- 402 3. Raj A, van Oudenaarden A. Nature, Nurture, or Chance: Stochastic Gene Expression and  
403 Its Consequences. *Cell.* 2008;135: 216–226. doi:10.1016/j.cell.2008.09.050
- 404 4. Grimbergen AJ, Siebring J, Solopova A, Kuipers OP. Microbial bet-hedging: the power of  
405 being different. *Curr Opin Microbiol.* 2015;25: 67–72.
- 406 5. Veening J-W, Smits WK, Kuipers OP. Bistability, epigenetics, and bet-hedging in  
407 bacteria. *Annu Rev Microbiol.* 2008;62: 193–210.  
408 doi:10.1146/annurev.micro.62.081307.163002
- 409 6. Xiong W, Ferrell JEJ. A positive-feedback-based bistable “memory module” that governs  
410 a cell fate decision. *Nature.* 2003;426: 460–465. doi:10.1038/nature02119.1.
- 411 7. Macarthur BD, Ma’ayan A, Lemischka IR. Systems biology of stem cell fate and cellular  
412 reprogramming. *Nat Rev Mol Cell Biol.* Nature Publishing Group; 2009;10: 672–681.  
413 doi:10.1038/nrm2766
- 414 8. Johnston M. A model fungal gene regulatory mechanism: the GAL genes of  
415 *Saccharomyces cerevisiae*. *Microbiol Rev.* 1987;51: 458.
- 416 9. Bhat PJ. *Galactose Regulon of Yeast: From Genetics to Systems Biology.* Berlin:  
417 Springer; 2008.
- 418 10. Lohr D, Venkov P, Zlatanova J, Program B, Academy B. Transcriptional regulation in the  
419 yeast GAL gene family: a complex genetic network. *FASEB J.* 1995;9: 777–787.
- 420 11. Escalante-chong R, Savir Y, Carroll SM, Ingraham JB, Wang J, Marx CJ, et al. Galactose  
421 metabolic genes in yeast respond to a ratio of galactose and glucose. *Proc Natl Acad Sci U*  
422 *S A.* 2015;112: 1636–1641. doi:10.1073/pnas.1418058112
- 423 12. Biggar SR, Crabtree GR. Cell signaling can direct either binary or graded transcriptional

- 424 responses. *EMBO J.* 2001;20: 3167–76. doi:10.1093/emboj/20.12.3167
- 425 13. Venturelli OS, El-Samad H, Murray RM. Synergistic dual positive feedback loops  
426 established by molecular sequestration generate robust bimodal response. *Proc Natl Acad*  
427 *Sci U S A.* 2012;109: 1–10. doi:10.1073/pnas.1211902109
- 428 14. Acar M, Becskei A, Oudenaarden A van. Enhancement of cellular memory by reducing  
429 stochastic transitions. *Nature.* 2005;435: 228. doi:10.1038/nature03524
- 430 15. Hawkins KM, Smolke CD. The regulatory roles of the galactose permease and kinase in  
431 the induction response of the GAL network in *Saccharomyces cerevisiae*. *J Biol Chem.*  
432 2006;281: 13485–92. doi:10.1074/jbc.M512317200
- 433 16. Acar M, Pando BF, Arnold FH, Elowitz MB, van Oudenaarden A. A general mechanism  
434 for network-dosage compensation in gene circuits. *Science (80- ).* 2010;329: 1656–60.  
435 doi:10.1126/science.1190544
- 436 17. Ramsey S a, Smith JJ, Orrell D, Marelli M, Petersen TW, de Atauri P, et al. Dual feedback  
437 loops in the GAL regulon suppress cellular heterogeneity in yeast. *Nat Genet.* 2006;38:  
438 1082–7. doi:10.1038/ng1869
- 439 18. Peng W, Liu P, Xue Y, Acar M. Evolution of gene network activity by tuning the strength  
440 of negative-feedback regulation. *Nat Commun.* 2015;6: 6226.
- 441 19. Lee KB, Wang J, Escalante-Chong R, Palme J, Springer M. Natural variation in *S.*  
442 *cerevisiae* glucose-galactose sensing is driven by polymorphisms in the signal transducer  
443 Gal3p. Unpublished. 2016;
- 444 20. Venturelli OS, Zuleta I, Murray RM, El-Samad H. Population diversification in a yeast  
445 metabolic program promotes anticipation of environmental shifts. *PLoS Biol.* 2015;13:  
446 e1002042. doi:http://dx.doi.org/10.1101/002907
- 447 21. Wang J, Atolia E, Hua B, Savir Y, Escalante-chong R. Natural Variation in Preparation  
448 for Nutrient Depletion Reveals a Cost – Benefit Tradeoff. *PLoS Biol.* 2015; 1–31.  
449 doi:10.1371/journal.pbio.1002041
- 450 22. New AM, Cerulus B, Govers SK, Perez-Samper G, Zhu B, Boogmans S, et al. Different  
451 Levels of Catabolite Repression Optimize Growth in Stable and Variable Environments.  
452 Doebeli M, editor. *PLoS Biol.* 2014;12: e1001764. doi:10.1371/journal.pbio.1001764
- 453 23. Solopova A, van Gestel J, Weissing FJ, Bachmann H, Teusink B, Kok J, et al. Bet-  
454 hedging during bacterial diauxic shift. *Proc Natl Acad Sci U S A.* 2014;111: 7427–32.  
455 doi:10.1073/pnas.1320063111
- 456 24. Liti G, Carter DM, Moses AM, Warringer J, Parts L, James S a, et al. Population  
457 genomics of domestic and wild yeasts. *Nature.* Nature Publishing Group; 2009;458: 337–  
458 41. doi:10.1038/nature07743
- 459 25. Cromie G a, Hyma KE, Ludlow CL, Garmendia-Torres C, Gilbert TL, May P, et al.

- 460 Genomic sequence diversity and population structure of *Saccharomyces cerevisiae*  
461 assessed by RAD-seq. *G3* (Bethesda). 2013;3: 2163–71. doi:10.1534/g3.113.007492
- 462 26. Edwards MD, Gifford DK. High-resolution genetic mapping with pooled sequencing.  
463 *BMC Bioinformatics*. BioMed Central Ltd; 2012;13 Suppl 6: S8.
- 464 27. Gancedo JM. Yeast Carbon Catabolite Repression. *Microbiol Mol Biol Rev*. 1998;62.
- 465 28. Ren B, Robert F, Wyrick JJ, Aparicio O, Jennings EG, Simon I, et al. Genome-wide  
466 location and function of DNA binding proteins. *Science*. 2000;290: 2306–9.  
467 doi:10.1126/science.290.5500.2306
- 468 29. Hidalgo P, Ansari AZ, Schmidt P, Hare B, Simkovich N, Farrell S, et al. Recruitment of  
469 the transcriptional machinery through GAL11P: Structure and interactions of the GAL4  
470 dimerization domain. *Genes Dev*. 2001;15: 1007–1020. doi:10.1101/gad.873901
- 471 30. Hong M, Fitzgerald MX, Harper S, Luo C, Speicher DW, Marmorstein R. Structural Basis  
472 for Dimerization in DNA Recognition by Gal4. *Structure*. 2008;16: 1019–1026.  
473 doi:10.1016/j.str.2008.03.015
- 474 31. Himmelfarb HJ, Pearlberg J, Last DH, Ptashne M. GAL11P $\square$ : A Yeast Mutation That  
475 Potentiates the Effect of Weak GAL4-Derived Activators. *Cell*. 1990;63: 1299–1309.
- 476 32. Wickner RB. Plasmids Controlling Exclusion of the K2 Killer Double-Stranded RNA  
477 Plasmid of Yeast. *Cell*. 1980;21.
- 478 33. Tadauchi T, Inada T, Matsumoto K, Irie K. Posttranscriptional regulation of HO  
479 expression by the Mkt1-Pbp1 complex. *Mol Cell Biol*. 2004;24: 3670–3681.
- 480 34. Ehrenreich IM, Torabi N, Jia Y, Kent J, Martis S, Shapiro J a, et al. Dissection of  
481 genetically complex traits with extremely large pools of yeast segregants. *Nature*. Nature  
482 Publishing Group; 2010;464: 1039–1042.
- 483 35. Deutschbauer AM, Davis RW. Quantitative trait loci mapped to single-nucleotide  
484 resolution in yeast. *Nat Genet*. 2005;37: 1333–40. doi:10.1038/ng1674
- 485 36. Demogines A, Smith E, Kruglyak L, Alani E. Identification and dissection of a complex  
486 DNA repair sensitivity phenotype in Baker’s yeast. *PLoS Genet*. 2008;4: e1000123.
- 487 37. Dimitrov LN, Brem RB, Kruglyak L, Gottschling DE. Polymorphisms in multiple genes  
488 contribute to the spontaneous mitochondrial genome instability of *Saccharomyces*  
489 *cerevisiae* {S288C} strains. *Genetics*. 2009;183: 365–383.
- 490 38. Kim HS, Fay JC. A combined-cross analysis reveals genes with drug-specific and  
491 background-dependent effects on drug sensitivity in *Saccharomyces cerevisiae*. *Genetics*.  
492 2009;183: 1141–1151.
- 493 39. Steinmetz LM, Sinha H, Richards DR, Spiegelman JI, Oefner PJ, McCusker JH, et al.  
494 Dissecting the architecture of a quantitative trait locus in yeast. *Nature*. 2002;416: 326–

- 495 330.
- 496 40. Lee S-I, Dudley AM, Drubin D, Silver PA, Krogan NJ, Pe'er D, et al. Learning a prior on  
497 regulatory potential from eQTL data. *PLoS Genet.* 2009;5: e1000358.
- 498 41. Gerber AP, Herschlag D, Brown PO. Extensive Association of Functionally and  
499 Cytotopically Related mRNAs with Puf Family RNA-Binding Proteins in Yeast. Sean  
500 Eddy, editor. *PLoS Biol. Public Library of Science*; 2004;2: e79.  
501 doi:10.1371/journal.pbio.0020079
- 502 42. Hua B, Springer M. Hierarchical structure explains why a quarter of the yeast genome  
503 affects a quantitative trait.
- 504 43. Bloom JS, Ehrenreich IM, Loo WT, Lite T-LV, Kruglyak L. Finding the sources of  
505 missing heritability in a yeast cross. *Nature.* 2013;494: 234–7. doi:10.1038/nature11867
- 506 44. Hou J, Sigwalt A, Fournier T, Pflieger D, Peter J, de Montigny J, et al. The Hidden  
507 Complexity of Mendelian Traits across Natural Yeast Populations. *Cell Rep.* 2016;
- 508 45. Johnston M, Flick JS, Pextont T. Multiple Mechanisms Provide Rapid and Stringent  
509 Glucose Repression of GAL Gene Expression in *Saccharomyces cerevisiae*. 1994;14.  
510 doi:10.1128/MCB.14.6.3834.Updated
- 511 46. Carlson M, Osmond BC, Botstein D. Mutants of yeast defective in sucrose utilization.  
512 *Genetics.* 1981;98.
- 513 47. Zimmermann, Friedrich K Entian K-D. *Yeast sugar metabolism.* CRC Press; 1997.
- 514 48. Huberts DHEW, Niebel B, Heinemann M. A flux-sensing mechanism could regulate the  
515 switch between respiration and fermentation. *FEMS Yeast Res.* 2012;12: 118–128.  
516 doi:10.1111/j.1567-1364.2011.00767.x
- 517 49. Turcotte B, Liang XB, Robert F, Soontornngun N. Transcriptional regulation of  
518 nonfermentable carbon utilization in budding yeast. *FEMS Yeast Res.* 2010;10: 2–13.  
519 doi:10.1111/j.1567-1364.2009.00555.x
- 520 50. DeRisi JL. Exploring the Metabolic and Genetic Control of Gene Expression on a  
521 Genomic Scale. *Science (80- ).* 1997;278: 680–686. doi:10.1126/science.278.5338.680
- 522 51. van Dijken JP, Scheffers WA. Redox balances in the metabolism of sugars by yeasts.  
523 *FEMS Microbiol Lett.* 1986;32: 199–224. doi:10.1016/0378-1097(86)90291-0
- 524 52. Stockwell SR, Landry CR, Rifkin S a. The yeast galactose network as a quantitative  
525 model for cellular memory. *Mol Biosyst. Royal Society of Chemistry*; 2014;
- 526 53. Kumar PR, Yu Y, Sternglanz R, Johnston SA, Joshua-Tor L, Rajesh Kumar P, et al.  
527 NADP Regulates the Yeast GAL Induction System. *Science (80- ).* 2008;319: 1090–2.  
528 doi:10.1126/science.1151903
- 529 54. Li Y, Chen G, Liu W. Multiple metabolic signals influence GAL gene activation by

- 530 modulating the interaction of Gal80p with the transcriptional activator Gal4p. *Mol*  
531 *Microbiol.* 2010;78: 414–428. doi:10.1111/j.1365-2958.2010.07343.x
- 532 55. Healey D, Axelrod K, Gore J. Negative frequency-dependent interactions can underlie  
533 phenotypic heterogeneity in a clonal microbial population. *Mol Syst Biol.* 2016;12: 877.
- 534 56. Hashida-Okado T, Ogawa A, Kato I, Takesako K. Transformation system for prototrophic  
535 industrial yeasts using the AUR1 gene as a dominant selection marker. *FEBS Lett.*  
536 1998;425: 117–122. doi:10.1016/S0014-5793(98)00211-7
- 537 57. Treusch S, Albert FW, Bloom JS, Kottenko IE, Kruglyak L. Genetic Mapping of MAPK-  
538 Mediated Complex Traits Across *S. cerevisiae*. *PLoS Genet.* 2015;11: e1004913.  
539 doi:10.1371/journal.pgen.1004913
- 540 58. Cubillos F a, Parts L, Salinas F, Bergström A, Scovacicchi E, Zia A, et al. High-  
541 resolution mapping of complex traits with a four-parent advanced intercross yeast  
542 population. *Genetics.* 2013;195: 1141–55. doi:10.1534/genetics.113.155515
- 543 59. Baym M, Kryazhimskiy S, Lieberman TD, Chung H, Desai MM, Kishony R. Inexpensive  
544 Multiplexed Library Preparation for Megabase-Sized Genomes. *PLoS One.* 2015;10:  
545 e0128036. doi:10.1371/journal.pone.0128036
- 546 60. Edwards MD, Gifford DK. High-resolution genetic mapping with pooled sequencing.  
547 *BMC Bioinformatics.* BioMed Central Ltd; 2012;13 Suppl 6: S8. doi:10.1186/1471-2105-  
548 13-S6-S8
- 549 61. Treusch S, Albert FW, Bloom JS, Kottenko IE, Kruglyak L. Genetic Mapping of {MAPK-  
550 Mediated} Complex Traits Across *S. cerevisiae*. *PLoS Genet.* 2015;11: e1004913.
- 551 62. Albert FW, Treusch S, Shockley AH, Bloom JS, Kruglyak L. Genetics of single-cell  
552 protein abundance variation in large yeast populations. *Nature.* Nature Publishing Group;  
553 2014;506: 494–497. doi:10.1038/nature12904
- 554 63. DiCarlo JE, Norville JE, Mali P, Rios X, Aach J, Church GM. Genome engineering in  
555 *Saccharomyces cerevisiae* using CRISPR-Cas systems. *Nucleic Acids Res.* 2013;41.
- 556 64. Horwitz AA, Walter JM, Schubert MG, Kung SH, Hawkins K, Platt DM, et al. Efficient  
557 Multiplexed Integration of Synergistic Alleles and Metabolic Pathways in Yeasts via  
558 CRISPR-Cas. *Cell Syst.* Elsevier; 2015; 1–9. doi:10.1016/j.cels.2015.02.001
- 559



## 560 **Figure Captions**

### 561 **Figure 1. Natural variation in GAL induction can be analyzed in terms of two uncorrelated** 562 **features**

563 Each plot is a series of YFP fluorescence (normalized to side scatter “SSC”) histograms from 12  
564 sugar conditions for strains (A) I14, (B) S288C, (C) DBVPG1106, and (D) YJM978. Other  
565 phenotyped strains are shown in Figure S1. Darker regions represent more frequently observed  
566 YFP values. The middle 10 conditions in each plot are 0.25% galactose + the indicated  
567 concentrations of glucose. The first and last conditions contain only one sugar: “D”, 2% glucose;  
568 “G”, 2% galactose. (E) Identification of induced cell subpopulation (green shading) using a  
569 reference distribution from 2% glucose (black histogram) (Materials and Methods). (F) Induced  
570 level (blue line) and induced fraction (orange line), and the corresponding  $E_{10}$  and  $F_{50}$  metrics,  
571 for strain DBVPG1106. (G) Scatterplot of  $E_{10}$  versus  $F_{50}$  across 34 *S. cerevisiae* natural isolates  
572 (mean and S.D.; n=3-10).

### 573 **Figure 2. Bulk segregant analysis of $E_{10}$ and $F_{50}$**

574 (A)  $E_{10}$  versus  $F_{50}$  across 90 haploid segregants of the DBVPG1106 x S288C cross. Parent  
575 phenotypes are shown as filled circles: DBVPG1106 (red), S288C (blue). (B) Schematic of bulk  
576 segregant analysis strategy. (C) GAL reporter histograms of parent strains DBVPG1106 (red)  
577 and S288C (blue) and a pool of haploid segregants (gray, bottom) in the sorting conditions,  
578 0.25% glucose + 0.25% galactose. Green boxes are a schematic of the gates used to sort  
579 segregant cells into 3 phenotyped pools for sequencing (Gates used in actual sorting experiment  
580 are shown in Figure S3). ON pool allele counts are a computational sum of the LOW and HI  
581 pool allele counts (Materials and methods). (D) Genome-wide plots of differential allele  
582 frequency and log-odds-ratio (LOD) as computed by the MULTIPOOL algorithm (see Main  
583 Text, Materials and Methods). Top two panels show the OFF/ON comparison; bottom two  
584 panels show the LOW/HIGH comparison.

### 585 **Figure 3. Combinatorial effects of strain background and *GAL3*, *MKT1*, and *GAL4* alleles.**

586 (A)  $E_{10}$  versus  $F_{50}$  for all 16 combinations of S288C (“S”) or DBVPG1106 (“D”) strain  
587 background (gray letters), *GAL3* allele (red), *MKT1* allele (green), and *GAL4* allele (blue).  
588 Effects of switching from DBVPG1106 to S288C variant while holding other genetic variables

589 constant are shown as arrows for switching (B) *GAL3* allele, (C) *MKT1* allele, (D) *GAL4* allele,  
590 or (E) strain background. (F) The effects shown in (B)-(E) are plotted as differences in  $E_{10}$   
591 versus differences in  $F_{50}$ .

592 **Figure 4. Perturbations that affect  $F_{50}$  do not affect  $E_{10}$**

593 (A)  $F_{50}$  and  $E_{10}$  for allele-replacement strains with S288C, BC187, or DBVPG1106 genetic  
594 backgrounds but containing alleles of *GAL3* from various other natural isolates. (B)  $F_{50}$  and  $E_{10}$   
595 for 8 natural isolate strains induced in glucose+galactose after being cultured in raffinose,  
596 glycerol, or acetate. Raffinose pre-culture is the standard condition used for the other  
597 experiments in this paper.

598 **Figure 5. Changing  $F_{50}$  changes the number of modes of the GAL response**

599 Plotted are GAL reporter histogram series on a glucose gradient + galactose, as in Figure 1F,  
600 with induced expression level (blue line),  $E_{10}$  (dotted vertical blue line), induced fraction (orange  
601 line), and  $F_{50}$  (dotted vertical orange line). These plots show one representative experiment for  
602 each strain/condition, out of the 3-12 replicates plotted in Figures 4.3 and 4.4. Strains: (A)  
603 DBVPG1106 with all endogenous alleles; (B) DBVPG1106 with replacements by *GAL3* and  
604 *MKT1* alleles from S288C. (C) BC187 with endogenous alleles; (D) BC187 with replacement by  
605 *GAL3* allele from YJM978; (E) Y12-WashU cultured in raffinose prior to glucose + galactose  
606 (standard protocol); (F) Y12-WashU pre-cultured in acetate.

## 607 **Supporting Information**

### 608 **Text S1. All Supporting Figures**

609 Contains Figures S1-4 and their captions.

### 610 **Figure S1. GAL response phenotypes for 34 natural isolates**

611 Plotted are series of GAL1pr-YFP fluorescence (normalized to side scatter “SSC”) histograms  
612 from 12 sugar conditions for 34 strains. One replicate experiment (out of 3-10 replicates) is  
613 shown for each strain. Data from all replicates is used to calculate  $E_{10}$  and  $F_{50}$  for the scatterplot  
614 in Figure 1G.

### 615 **Figure S2. Bimodal phenotypes simulated using a subpopulation decomposition framework**

616 (A) Two simulated subpopulations, where the mean of the induced population is shown in blue.  
617 (B) 3 possible functions for the dependence of induced fraction on glucose. (C) Simulated  
618 population behaviors using the 3 induced fraction functions.

### 619 **Figure S3. Sorting strategy for bulk-segregant analysis**

620 (A) Backscatter versus forward scatter of unsorted segregant pool, obtained on Sony SH800 cell  
621 sorter. (B) Backscatter versus FITC (YFP), showing mixture of uninduced and induced cells.  
622 Backscatter was used as a proxy for cell size; therefore, it is correlated with fluorescence. Gating  
623 on backscatter (rectangle) isolates differences in GAL1pr-YFP reporter among the cells. (C)  
624 Gates for OFF, LOW, and HI cells were drawn after gating on backscatter and shaped to follow  
625 the backscatter-FITC correlation. (D) View of gated populations as histogram on FITC axis.

### 626 **Figure S4. Effect of allele replacement of *GAL3*, *MKT1*, or *GAL4* in DBVPG1106 and 627 S288C backgrounds.**

628 Scatterplots of  $E_{10}$  versus  $F_{50}$  for (A) DBVPG1106 strains where the indicated genes (and  
629 flanking regions) have been replaced by their S288C alleles; (B) S288C strains containing  
630 replacements by DBVPG1106 alleles. (C) Enlargement of region in (B) outlined by dotted  
631 rectangle. Small circles are individual replicates (12 replicates per genotype, comprising 6  
632 replicates each for 2 independently constructed isolates – see Materials and Methods); large  
633 circles indicate the mean. These plots show a subset of the same data as in Figure 3.

**A**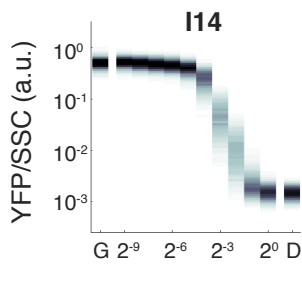**B**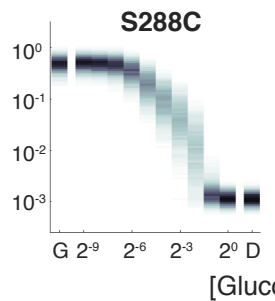**C**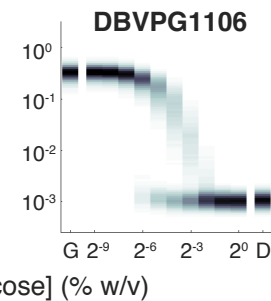**D**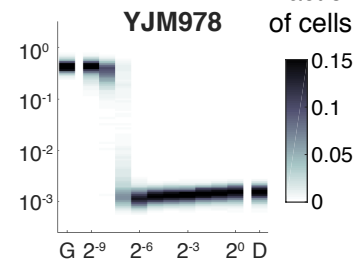**E**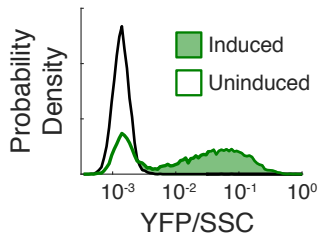**F**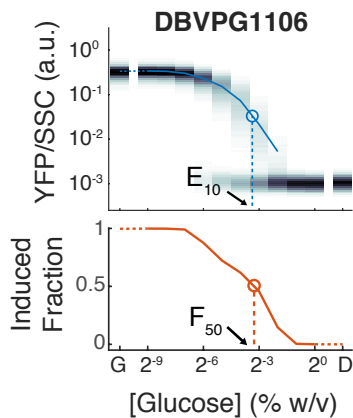**G**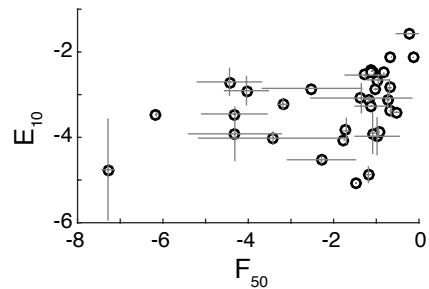

**A**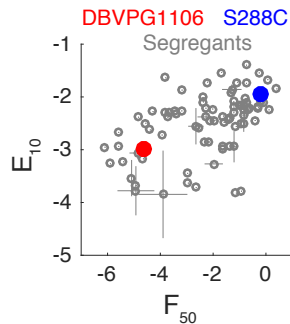**C**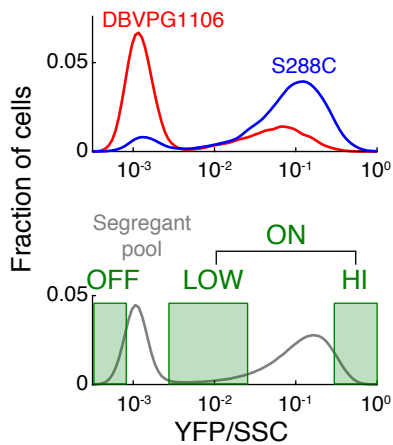**B**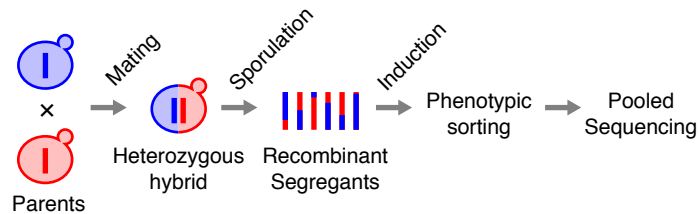**D**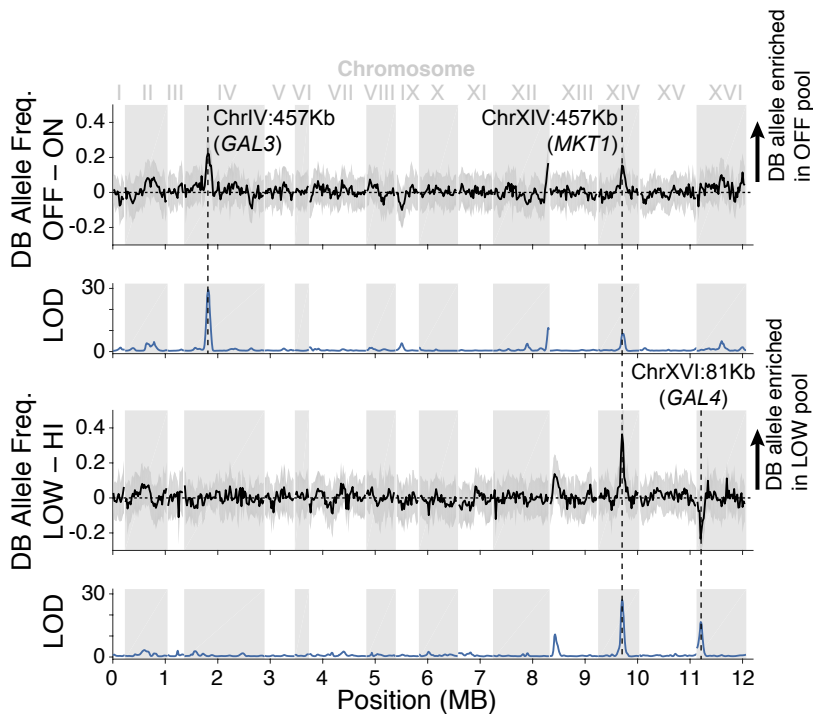

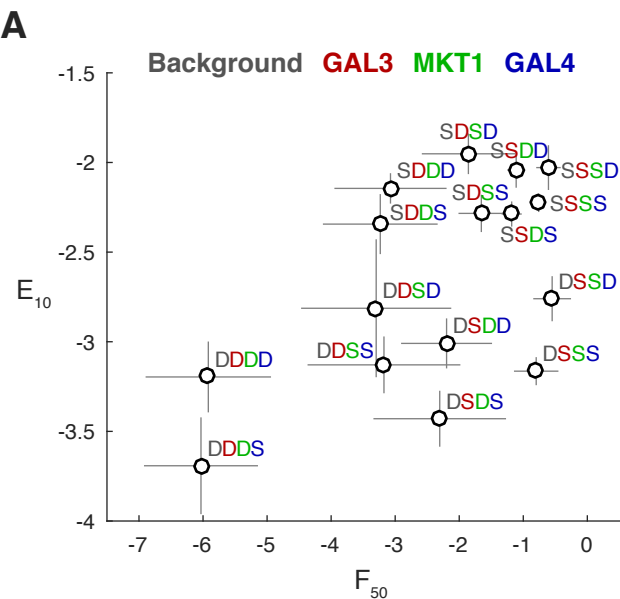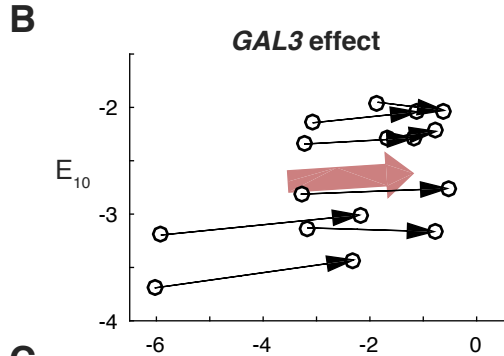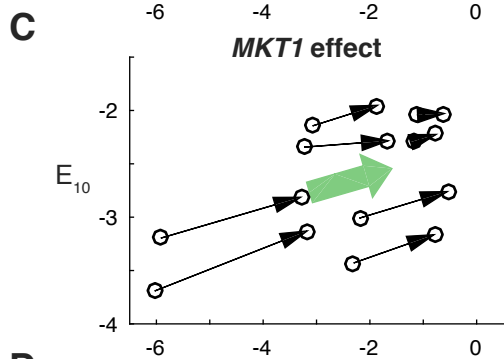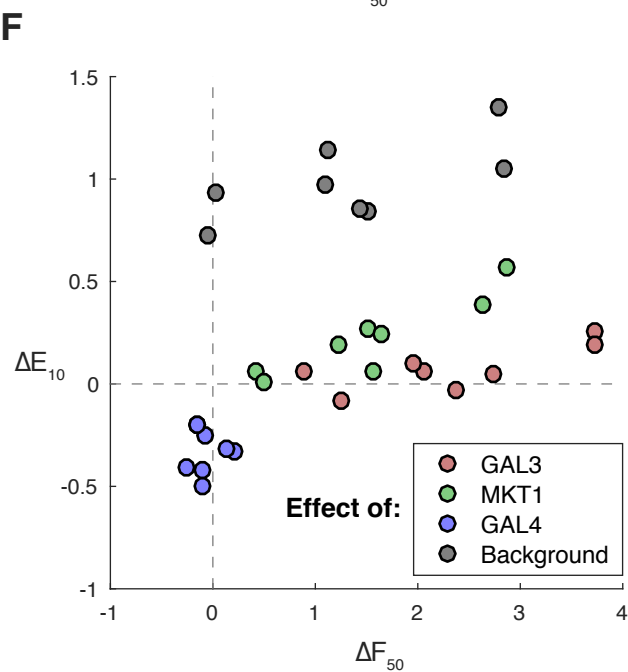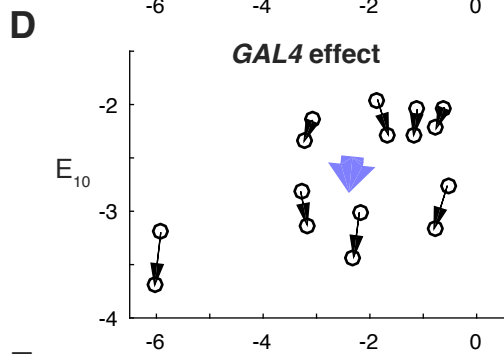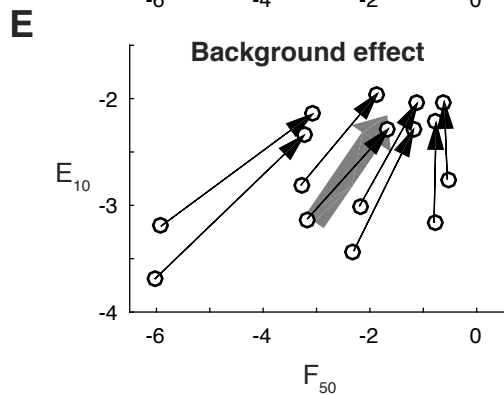

**A**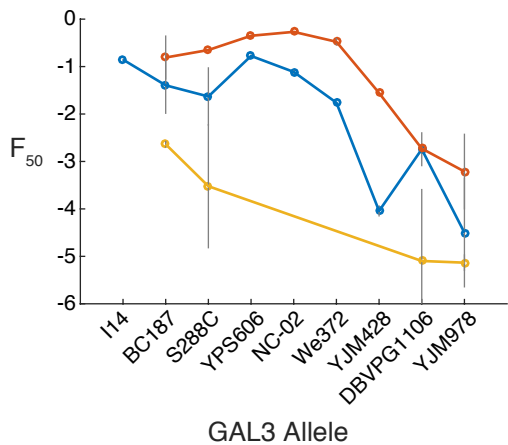**B**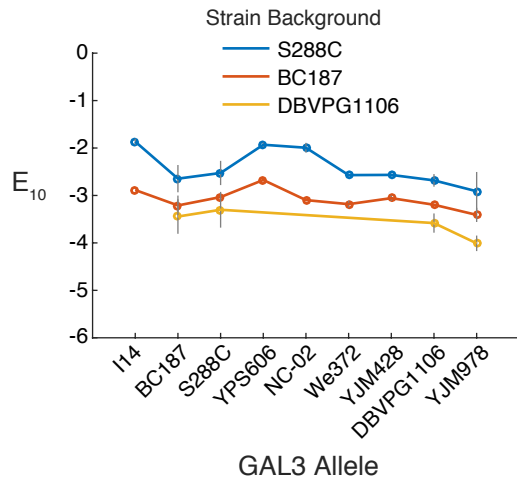**C**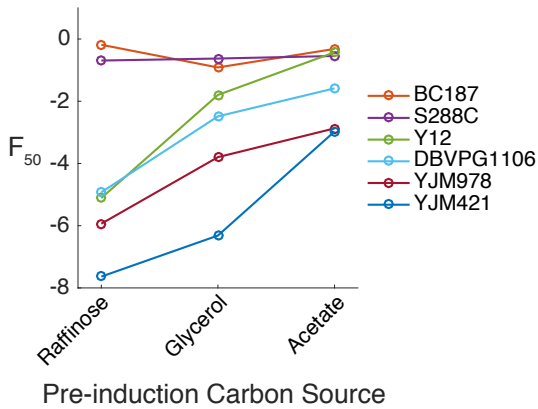**D**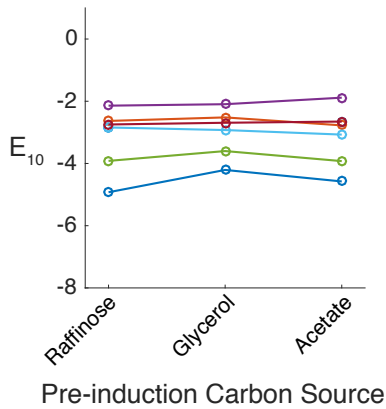

**A****DBVPG1106**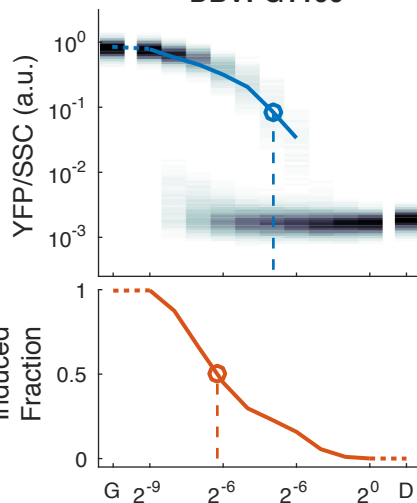**C****BC187**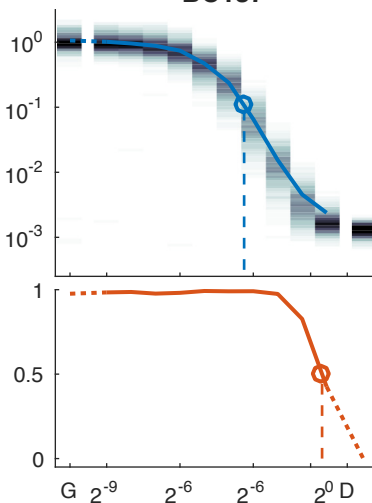**E****Y12-WashU (Raffinose)**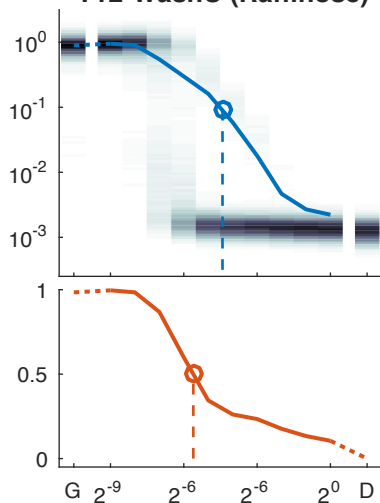**B****DBVPG1106**  
*GAL3<sup>S288C</sup> MKT1<sup>S288C</sup>*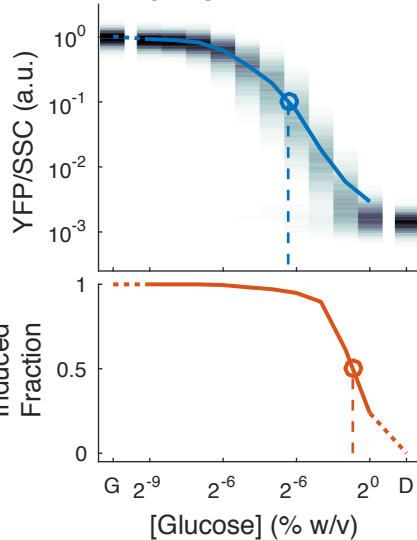**D****BC187 *GAL3<sup>YJM978</sup>***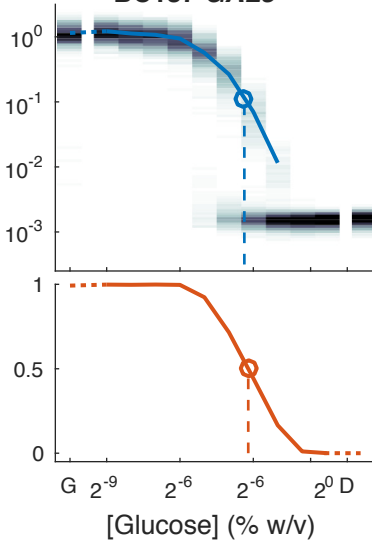**F****Y12-WashU (Acetate)**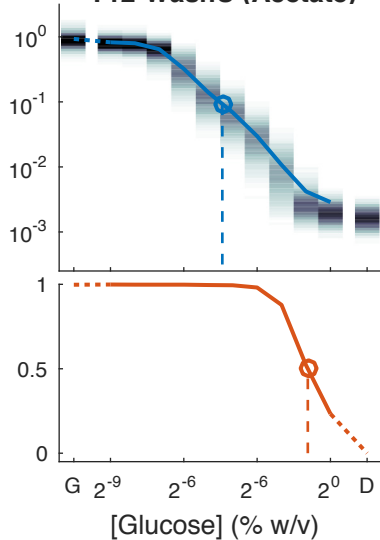

Source: http://biorxiv.org/content/10.1101/131938v1.full.pdf
